# Supplementary material for: Interface catalysis by Pt nanocluster@Ni3N for bifunctional hydrogen evolution and oxygen evolution
Source: Royal Society of Chemistry journal article supplement (doi:10.1039/d0qm00326c), 2020-01-01
Supplement: d0qm00326c1.pdf [file d0qm00326c1.pdf]

Supporting Information:

## **Interface catalysis by Pt nanocluster@Ni<sub>3</sub>N for bifunctional hydrogen evolution and oxygen evolution**

Yu Pei,<sup>a</sup> Babak Rezaei,<sup>c</sup> Xuyang Zhang,<sup>c</sup> Zichuang Li,<sup>a</sup> Hangjia Shen,<sup>c</sup> Minghui Yang,<sup>b,c,\*</sup> and Jiacheng Wang<sup>a,b,\*</sup>

<sup>a</sup> State Key Laboratory of High-Performance Ceramics and Superfine Microstructure, Shanghai Institute of Ceramics, Chinese Academy of Sciences, 585 Heshuo Road, Shanghai 201899, P. R. China

<sup>b</sup> Center of Materials Science and Optoelectronics Engineering, University of Chinese Academy of Sciences, Beijing 100049, P. R. China

<sup>c</sup> Ningbo Institute of Materials Technology and Engineering, Chinese Academy of Sciences, 1219 Zhongguan West Road, Ningbo 315201, P. R. China

\*Emails: myang@nimte.ac.cn; jiacheng.wang@mail.sic.ac.cn

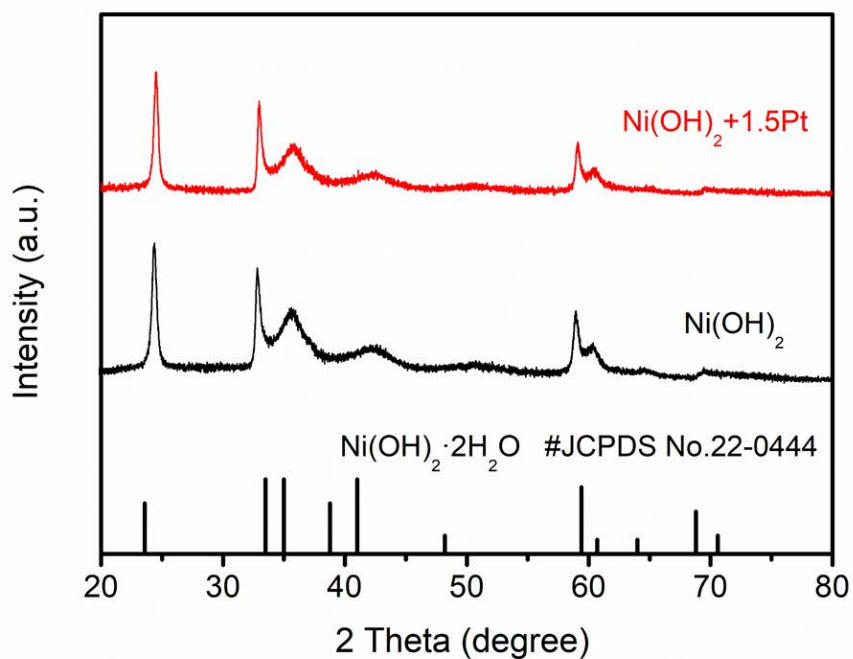

**Fig. S1** The XRD of precursor  $\text{Ni(OH)}_2 \cdot 2\text{H}_2\text{O}$  and  $\text{Ni(OH)}_2\text{-1.5Pt}$ .

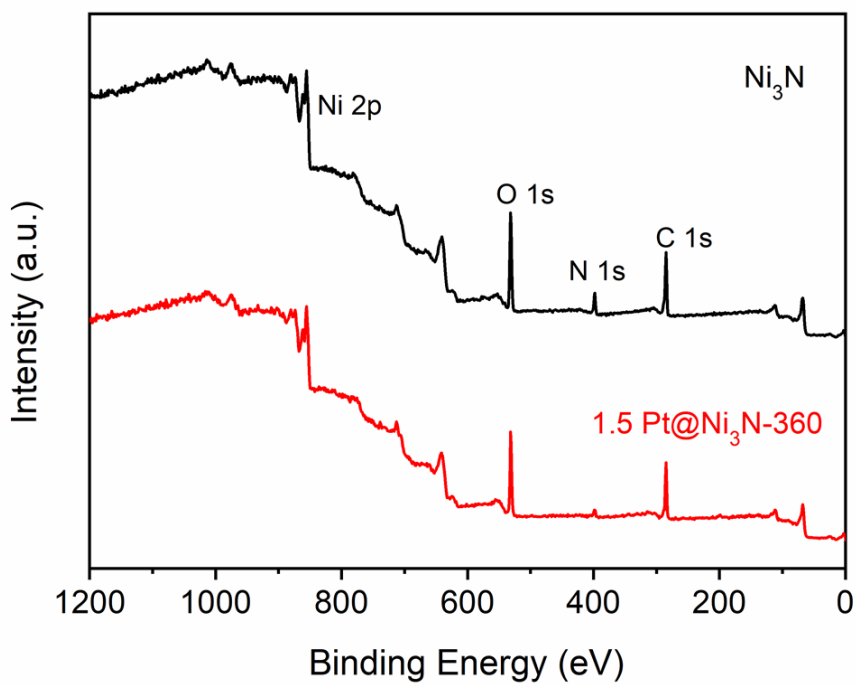

**Fig. S2** XPS survey spectra of  $\text{Ni}_3\text{N}$  and  $1.5 \text{ Pt@Ni}_3\text{N-360}$ .

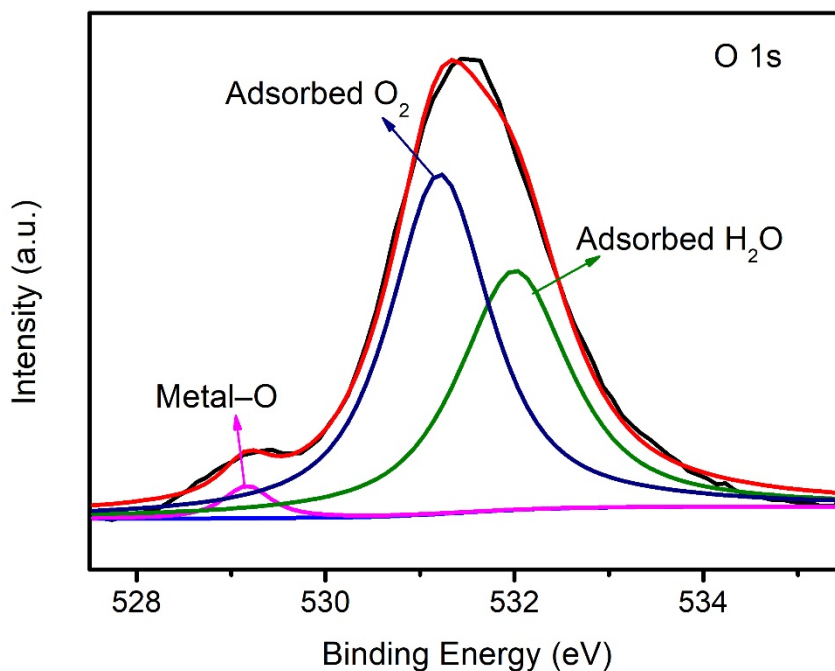

**Fig. S3** O 1s XPS spectra of 1.5 Pt@Ni<sub>3</sub>N-360.

**Table S1.** The comparison of 1.5Pt@Ni<sub>3</sub>N-360 in this work and state of art literature  
HER catalysts in alkaline solution.

| Catalyst                                 | Pt ratio | Electrolyte | Overpotential<br>at 10 mA<br>cm <sup>-2</sup> (mV) | Tafel slope<br>(mV dec <sup>-1</sup> ) | Reference                                 |
|------------------------------------------|----------|-------------|----------------------------------------------------|----------------------------------------|-------------------------------------------|
| 1.5Pt@Ni <sub>3</sub> N-360              | 1 wt%    | 0.1 M KOH   | 71                                                 | 48                                     | This work                                 |
| Pt-WS <sub>2</sub>                       | -        | 1 M KOH     | 50                                                 | 65                                     | Adv. Mater.,<br>2018, 30, 1704779.        |
| Ni <sub>3</sub> N/Pt                     | 15 wt%   | 1 M KOH     | 50                                                 | 36                                     | Adv. Energy Mater.,<br>2017, 7, 1601390   |
| PtNWs/SL-Ni(OH) <sub>2</sub>             | 38 wt%   | 1.0 M KOH   | ~70                                                |                                        | Nat. Commun.,<br>2015, 6, 6430            |
| NiO <sub>x</sub> /Pt <sub>3</sub> Ni NWs | 75 at%   | 1.0 M KOH   | 40                                                 |                                        | Angew. Chem. Int. Ed.,<br>2016, 55, 12859 |
| Pd-Pt-T                                  | 29 at%   | 1.0 M KOH   | 70                                                 |                                        | ACS Appl. Mater. Interfaces,              |

---

|                                          |         |           |        |    |                      |
|------------------------------------------|---------|-----------|--------|----|----------------------|
|                                          |         |           |        |    | 2017, 9, 18008       |
| hcp Pt–Ni                                | 14 at%  | 0.1 M KOH | 65     | 78 | Nat. Commun.,        |
|                                          |         |           |        |    | 2017, 8, 15131       |
| PtNi-Ni NA/CC                            | 7.7 wt% | 0.1 M KOH | 38     | 42 | Inorg. Chem. Front., |
|                                          |         |           |        |    | 2018, 5, 1365-1369.  |
| Pt <sub>3</sub> Ni <sub>2</sub> -NWs-S/C | 60.9    | 0.1 M KOH | 42     |    | Nat. Commun.,        |
|                                          | wt%     |           |        |    | 2017, 8, 14580       |
| Pt <sub>3</sub> Ni                       | 73 at%  | 0.1 M KOH | 65(E5) | 46 | Science,             |
|                                          |         |           |        |    | 2014, 343, 1339      |

---

**Table S2.** The comparison of 1.5Pt@Ni<sub>3</sub>N-360 in this work and state of art literature OER catalysts in alkaline solution.

| Catalyst                    | Pt ratio | Electrolyte | Overpotential at 10 mA cm <sup>-2</sup> (mV) | Tafel slope (mV dec <sup>-1</sup> ) | Reference                                      |
|-----------------------------|----------|-------------|----------------------------------------------|-------------------------------------|------------------------------------------------|
| 1.5Pt@Ni <sub>3</sub> N-360 | 1 wt%    | 0.1M KOH    | 285                                          | 57                                  | This work                                      |
| Pt/C-LiCoO <sub>2</sub>     | 10 wt%   | 0.1 M KOH   | 440                                          | 87                                  | J. Mater. Chem. A, 2016, 4, 4516-4524          |
| CoSe <sub>2-x</sub> -Pt     | 2.25 wt% | 0.1 M KOH   | 314                                          | 31                                  | Adv. Mater., 2019, 31, 1805581                 |
| Pt-CoS <sub>2</sub> /CC     | 7.3 wt%  | 1 M KOH     | 300                                          | 58                                  | Adv. Energy Mater., 2018, 8, 1800935           |
| Pt/Fe-Au nanorods           |          | 1.0 M KOH   | >570                                         |                                     | J. Mater. Chem. A, 2018, 6, 7364-7369          |
| Pt-NiFe LDH                 | 1.51wt%  | 1.0 M KOH   | 230                                          | 33                                  | Nano Energy, 2017, 39, 30-43                   |
| Co-PB/Pt                    | 4 wt%    | 1.0 M KOH   | 320                                          | 68                                  | ACS Sustain. Chem. Eng., 2017, 5, 11577-11583. |
| Co-Pt/C                     | 2.5 wt%  | 1.0 M KOH   | 320                                          | 72                                  | J. Mater. Chem. A, 2018, 6,20214-20223         |

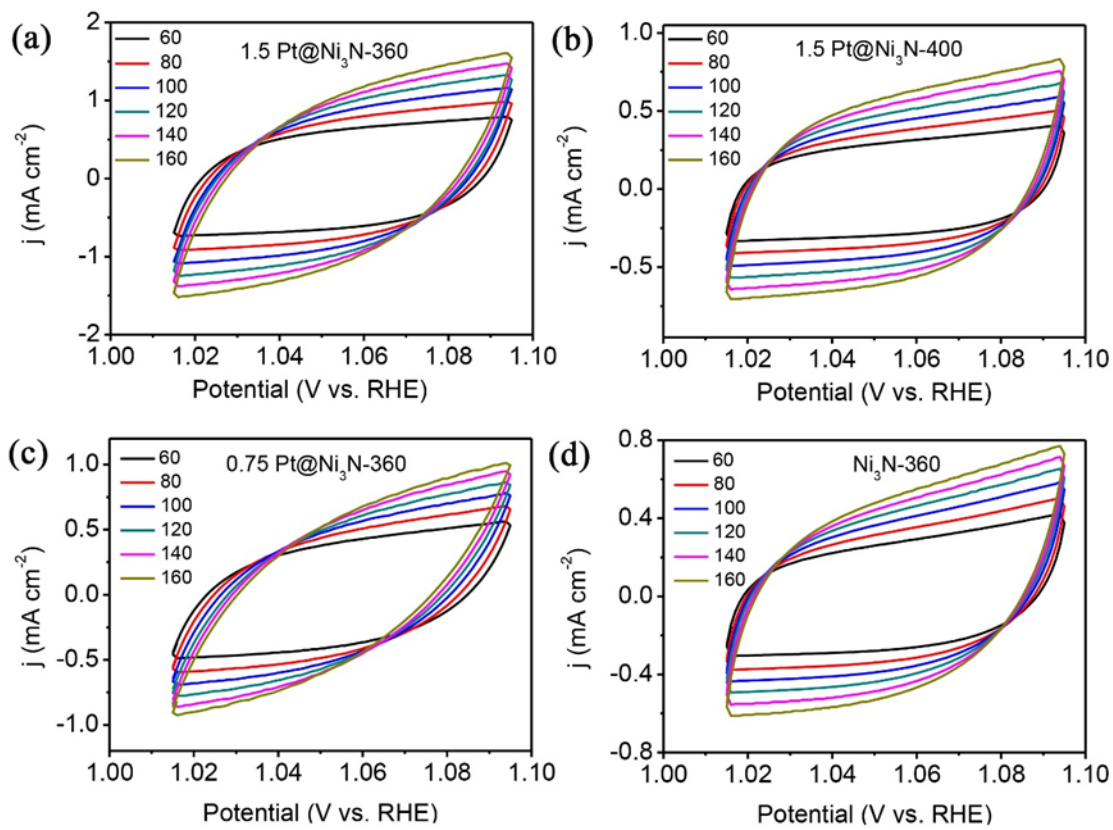

**Fig. S4** Typical cyclic voltammetry curves of (a) 1.5Pt@Ni<sub>3</sub>N-360; (b) 1.5Pt@Ni<sub>3</sub>N-400; (c) 0.75Pt@Ni<sub>3</sub>N-360; (d) Ni<sub>3</sub>N-360 with different scan rate.

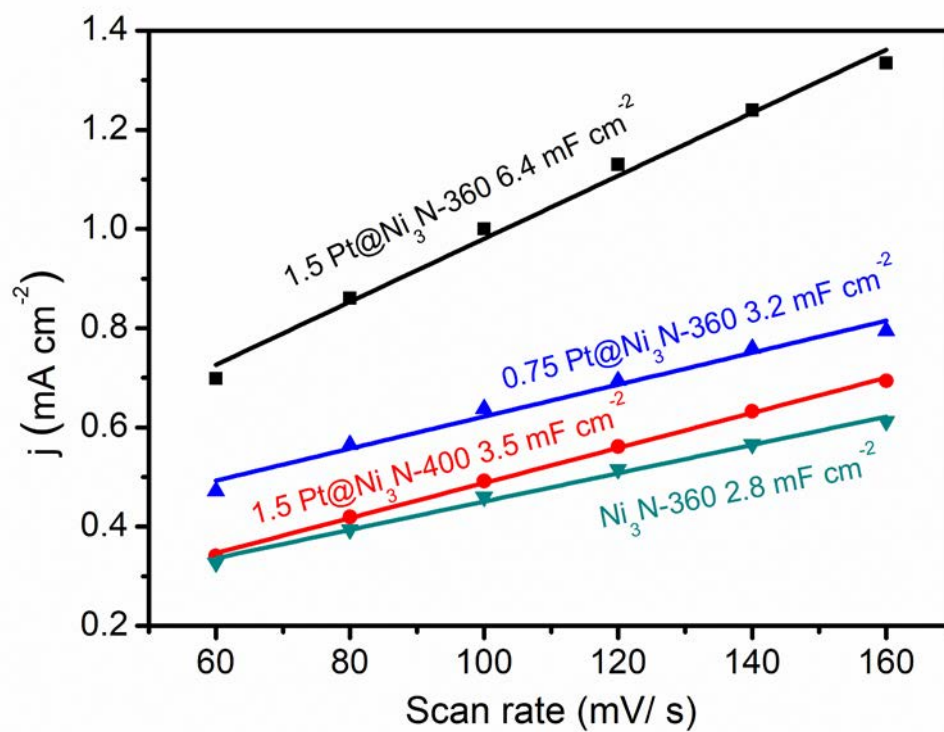

**Fig. S5** The electrochemically active surface area of 1.5Pt@Ni<sub>3</sub>N-360, 1.5Pt@Ni<sub>3</sub>N-400, 0.75Pt@Ni<sub>3</sub>N-360, Ni<sub>3</sub>N-360.

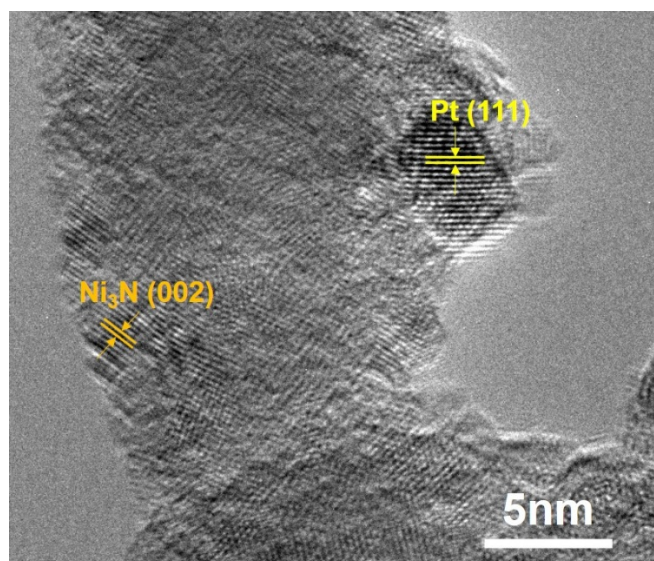

**Fig. S6** HRTEM image of 1.5 Pt@Ni<sub>3</sub>N-360 after reaction.

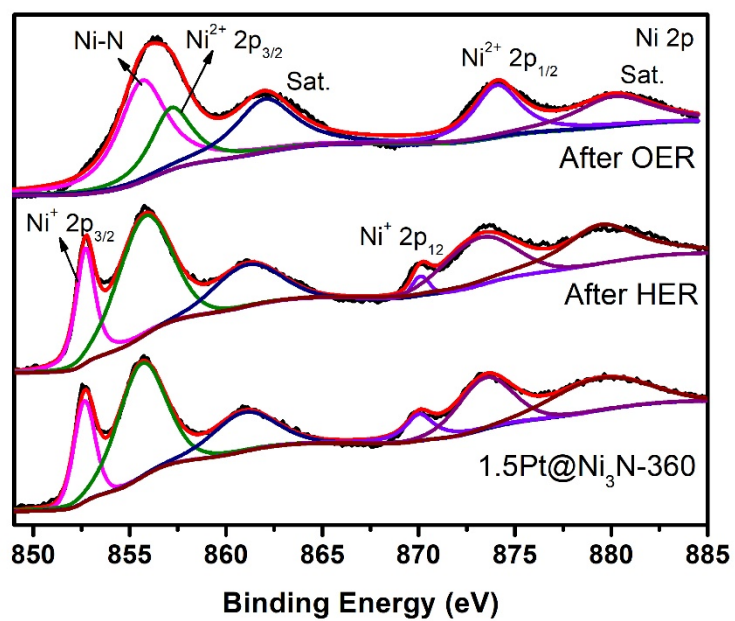

**Fig. S7** Ni 2p XPS spectra of 1.5 Pt@Ni<sub>3</sub>N-360 after HER/OER.



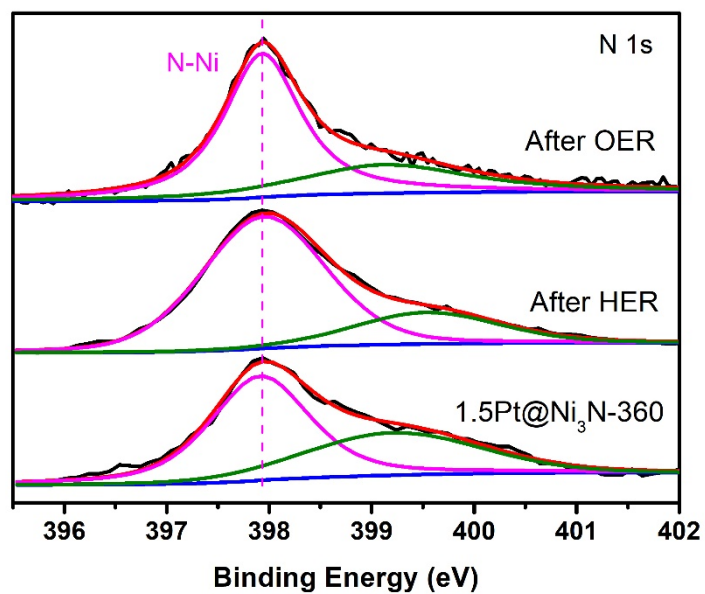

**Fig. S8** N 1s XPS spectra of 1.5 Pt@Ni<sub>3</sub>N-360 after HER/OER.

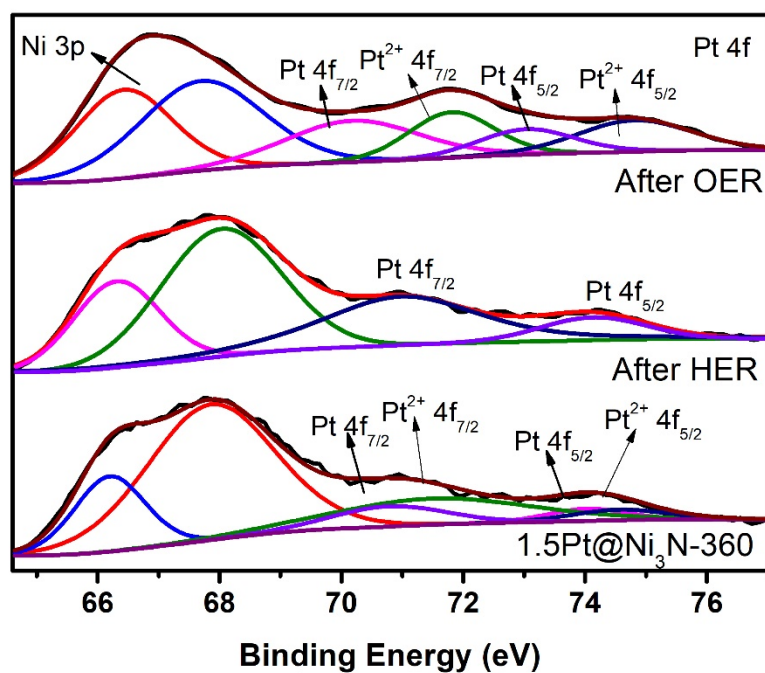

**Fig. S9** Pt 4f XPS spectra of 1.5 Pt@Ni<sub>3</sub>N-360 after HER/OER.

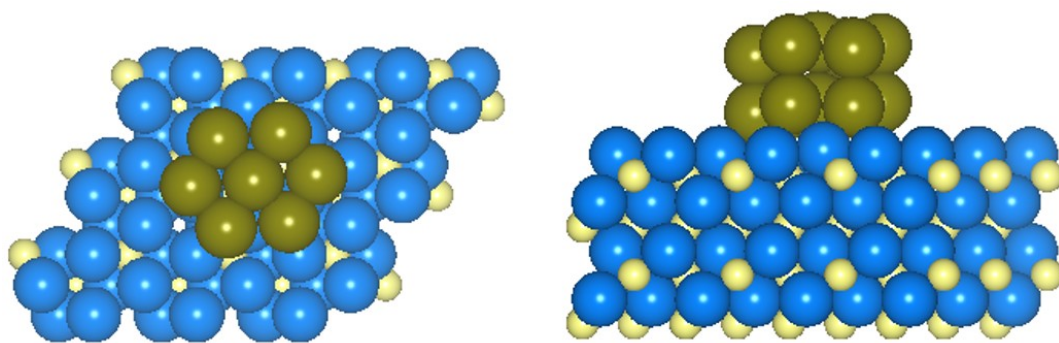

**Fig. S10** Top view (left) and side view (right) of the Pt@Ni<sub>3</sub>N.
